# Supplementary material for: Assembly of one-, two-, and three-dimensional Ln(iii) complexes constructed from a novel asymmetric tricarboxylic acid: synthesis, structure, photoluminescence and tunable white-light emission
Source: Royal Society of Chemistry journal article supplement (doi:10.1039/c6ce00483k), 2016-01-01
Supplement: c6ce00483k1.pdf [file c6ce00483k1.pdf]

# Assembly of one-, two-, and three-dimensional Ln(III) complexes constructed from a novel asymmetric tricarboxylate acid: synthesis, structure, photoluminescence and tunable white-light emission

Huijie Zhang, Ruiqing Fan,\* Yuwei Dong, Wei Chen, Xi Du, Ping Wang and Yulin Yang\*

## Index

|          | Content                                                                                                                                                                                                                                    | Page No. |
|----------|--------------------------------------------------------------------------------------------------------------------------------------------------------------------------------------------------------------------------------------------|----------|
| Fig. S1  | The coordination modes and configuration H <sub>3</sub> dpob ligand.                                                                                                                                                                       | 1        |
| Fig. S2  | View of the 2D supramolecular layer net in complex <b>1</b> along the <i>b</i> axis.                                                                                                                                                       | 1        |
| Fig. S3  | (a) A 3D supramolecular structure of complex <b>2</b> generated through O-H...O hydrogen bonds along the <i>a</i> axis (hydrogen bonds are shown by green dots).<br>(b) Topological view the 3D structure of <b>2</b> with <b>pcu</b> net. | 2        |
| Fig. S4  | (a) A 3D supramolecular structure of complex <b>6</b> generated through O-H...O hydrogen bonds (hydrogen bonds are shown by green dots).<br>(b) Topological view the 3D structure of <b>6</b> with <b>tfz-d</b> net.                       | 2        |
| Fig. S5  | The metal coordination environment in <b>7</b> with labeling scheme and 50% thermal ellipsoids (hydrogen atoms are omitted for clarity).                                                                                                   | 3        |
| Fig. S6  | The PXRD patterns of complexes <b>1-9</b> with the relevant simulated patterns.                                                                                                                                                            | 3        |
| Fig. S7  | UV-vis absorption spectrum of H <sub>3</sub> dpob ligand in the solid state (right).                                                                                                                                                       | 4        |
| Fig. S8  | Excitation spectra of complexes <b>1, 2, 6, and 7</b> in the solid state at 298 K and 77 K.                                                                                                                                                | 4        |
| Fig. S9  | Solid-state emission spectra of complexes <b>1, 2, 6, and 7</b> at 77 K.                                                                                                                                                                   | 5        |
| Fig. S10 | Luminescence decay curves of complexes <b>1, 2, 6, and 7</b> in the solid state at 298 K (left) and 77 K (right).                                                                                                                          | 6        |
| Fig. S11 | Excitation spectra of complexes <b>5 and 9</b> in the solid state at 298 K and 77 K.                                                                                                                                                       | 7        |
| Fig. S12 | Luminescence decay curves of complexes <b>5 and 9</b> in the solid state at 298 K and 77 K.                                                                                                                                                | 7        |
| Fig. S13 | Emission spectrum of complex <b>8</b> in the solid state at 298 K.                                                                                                                                                                         | 8        |
| Fig. S14 | The PXRD patterns of doped material $\{[\text{Gd}_{0.92}\text{Eu}_{0.04}\text{Tb}_{0.04}(\text{dpob})(\text{H}_2\text{O})_2] \cdot 0.5\text{H}_2\text{O}\}_n$ with the relevant simulated pattern.                                         | 8        |
| Fig. S15 | Solid-state emission spectra of doped material $\{[\text{Gd}_{0.92}\text{Eu}_{0.04}\text{Tb}_{0.04}(\text{dpob})(\text{H}_2\text{O})_2] \cdot 0.5\text{H}_2\text{O}\}_n$ excited at different wavelength.                                  | 9        |
| Table S1 | Selected bond lengths in complexes <b>1-9</b>                                                                                                                                                                                              | 10       |
| Table S2 | Selected bond angles in complexes <b>1-9</b> .                                                                                                                                                                                             | 11-13    |
| Table S3 | The geometrical parameters of hydrogen bond and $\pi \cdots \pi$ stacking interactions of Ln(III) complexes.                                                                                                                               | 14       |

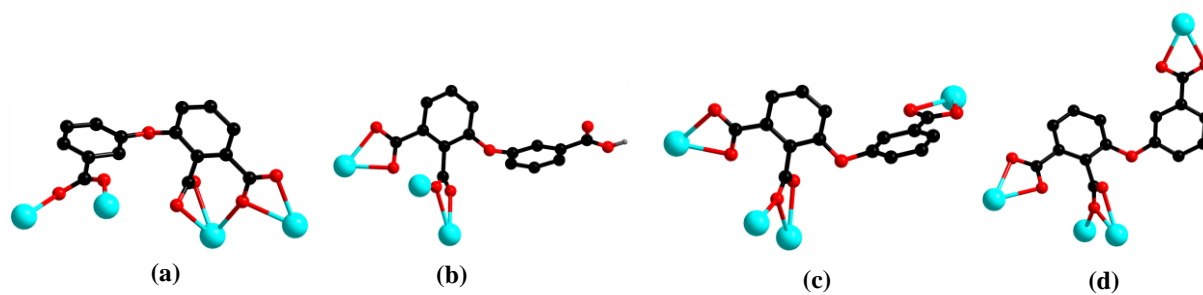

**Fig. S1** The coordination modes and configuration H<sub>3</sub>dpob ligand.

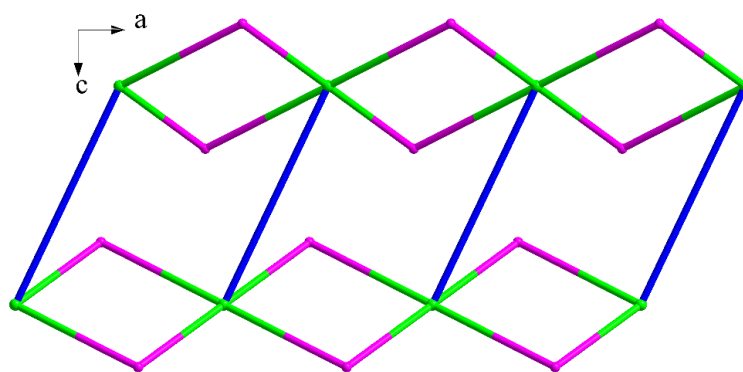

**Fig. S2** View of the 2D supramolecular layer net in complex **1** along the *b* axis.

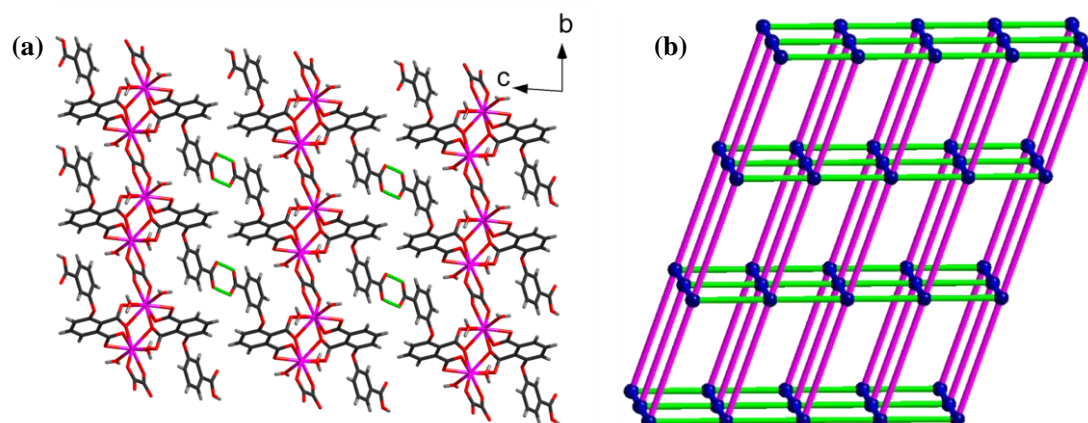

**Fig. S3** (a) A 3D supramolecular structure of complex **2** generated through O-H $\cdots$ O hydrogen bonds along the *a* axis (hydrogen bonds are shown by green dots). (b) Topological view the 3D structure of **2** with **pcu** net.

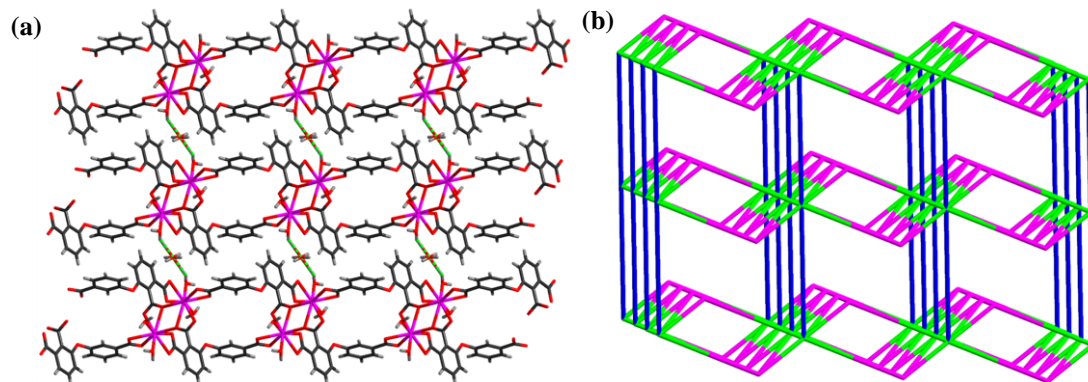

**Fig. S4** (a) A 3D supramolecular structure of complex **6** generated through O-H $\cdots$ O hydrogen bonds (hydrogen bonds are shown by green dots). (b) Topological view the 3D structure of **6** with **tfz-d** net.

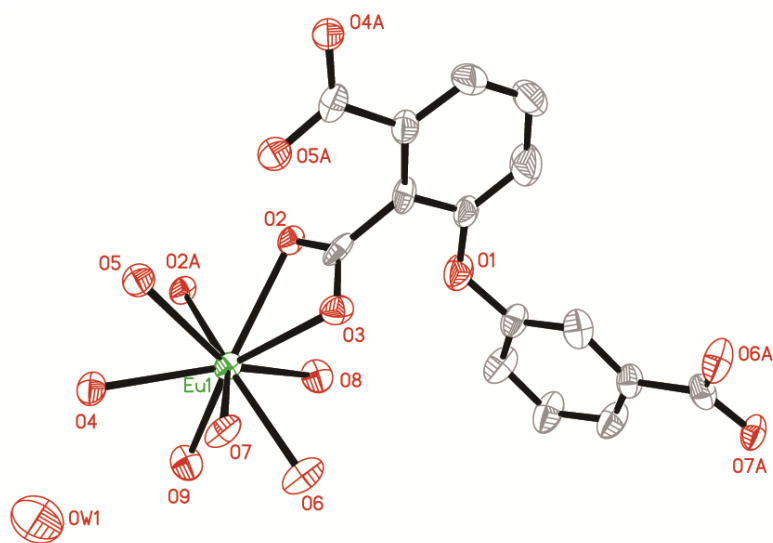

**Fig. S5** The metal coordination environment in **7** with labeling scheme and 50% thermal ellipsoids (hydrogen atoms are omitted for clarity).

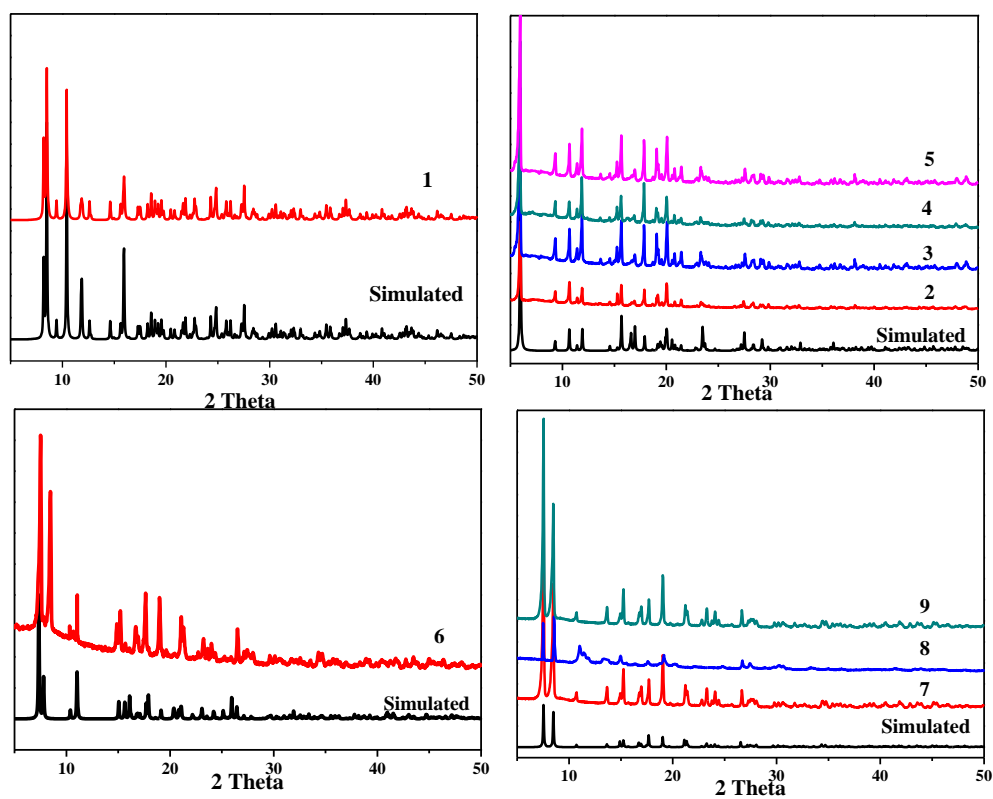

**Fig. S6** The PXRD patterns of complexes **1-9** with the relevant simulated patterns.

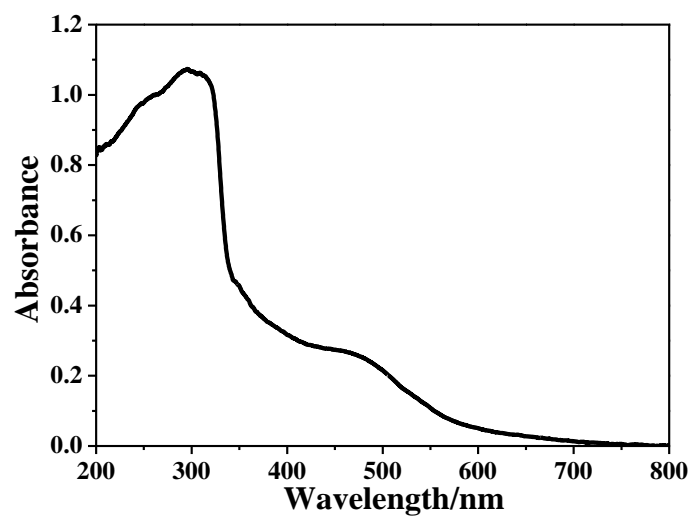

**Fig. S7** UV-vis absorption spectrum of H<sub>3</sub>dpob ligand in the solid state.

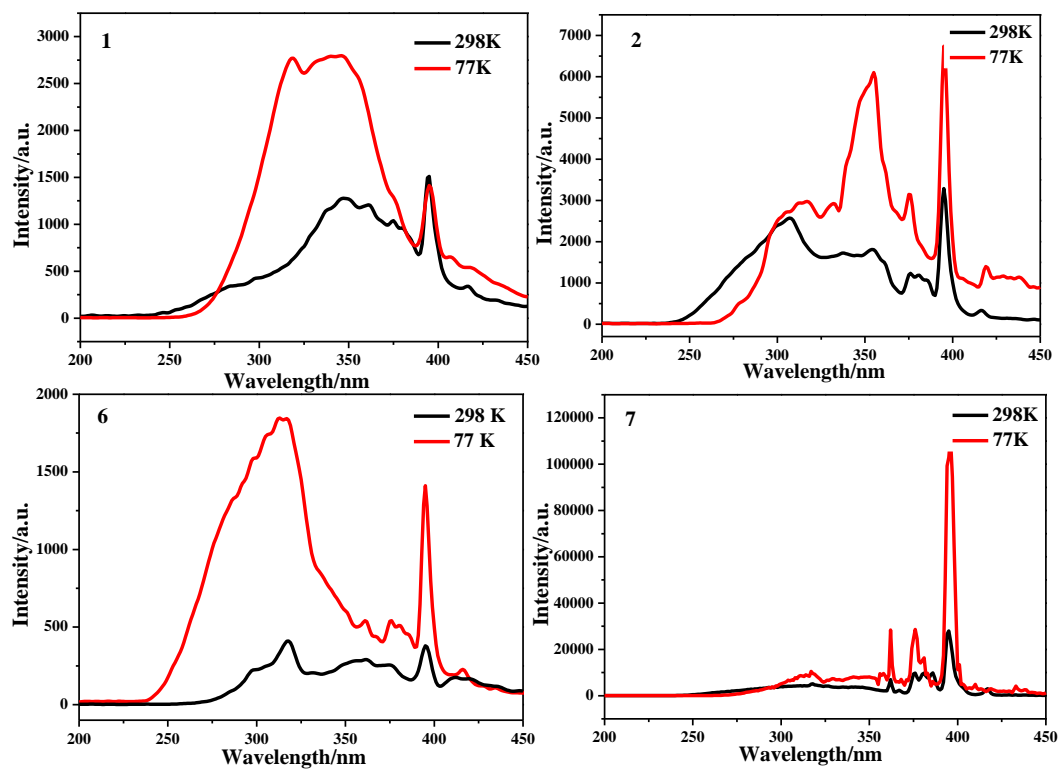

**Fig. S8** Excitation spectra of complexes **1**, **2**, **6**, and **7** in the solid state at 298 K and 77 K.

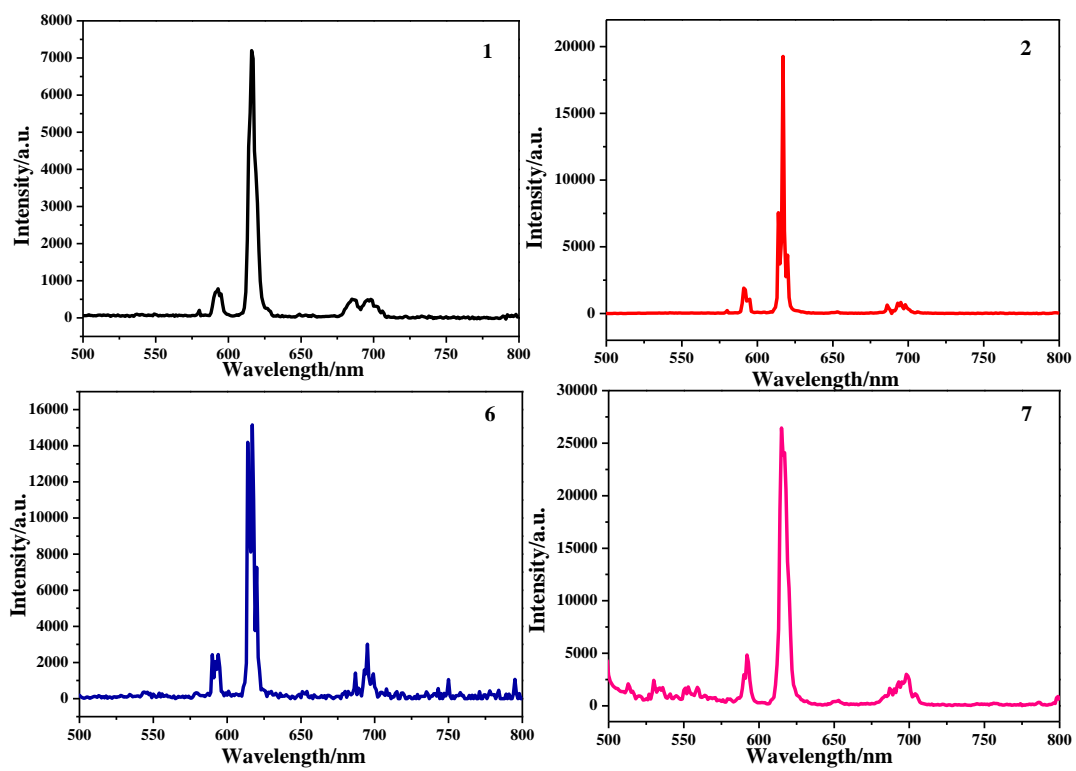

**Fig. S9** Solid-state emission spectra of complexes **1**, **2**, **6**, and **7** at 77 K.

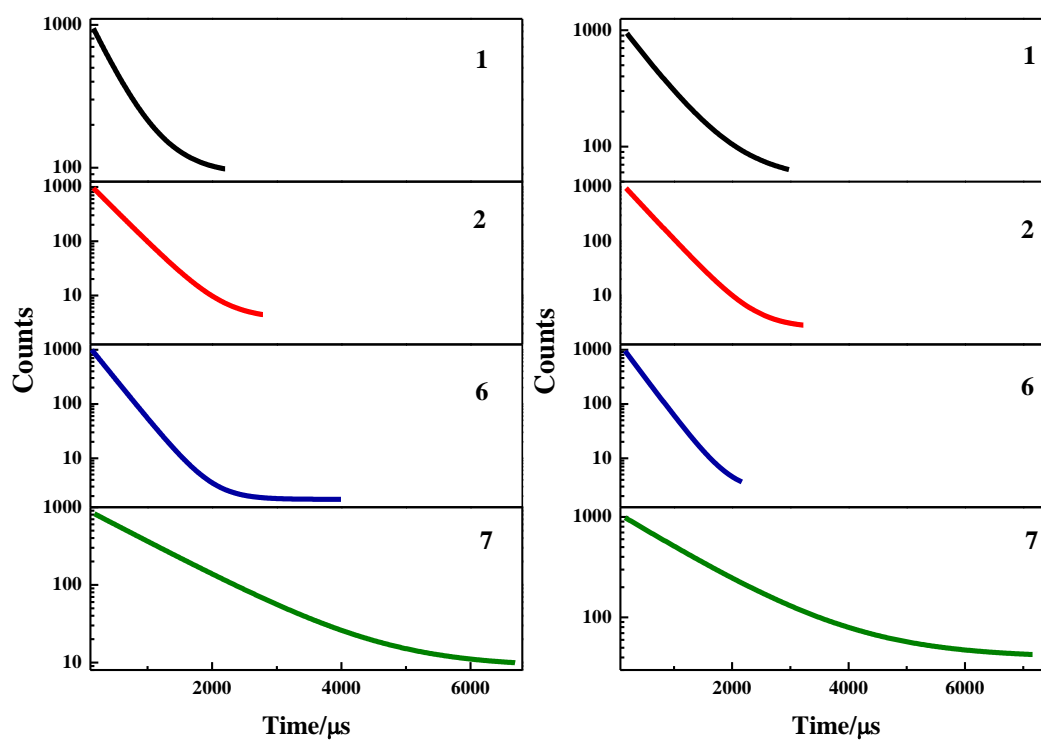

**Fig. S10** Luminescence decay curves of complexes **1**, **2**, **6**, and **7** in the solid state at 298 K (left) and 77 K (right).

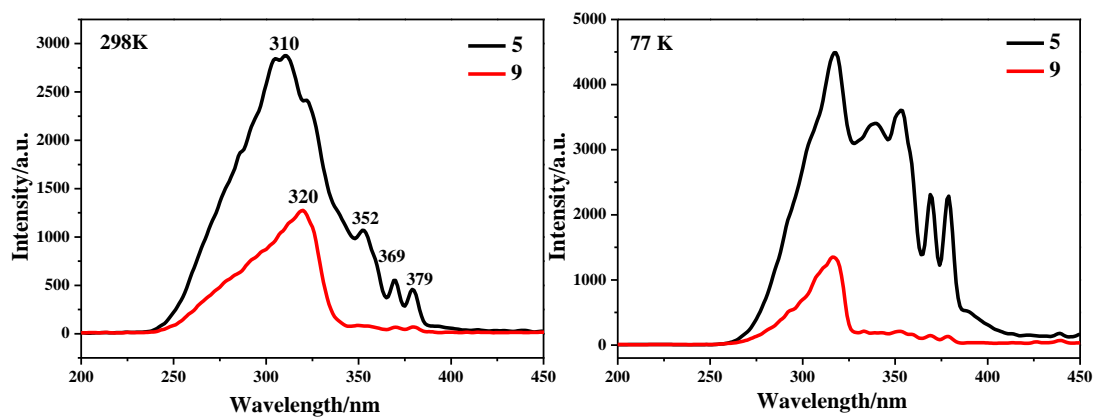

**Fig. S11** Excitation spectra of complexes **5** and **9** in the solid state at 298 K and 77 K.

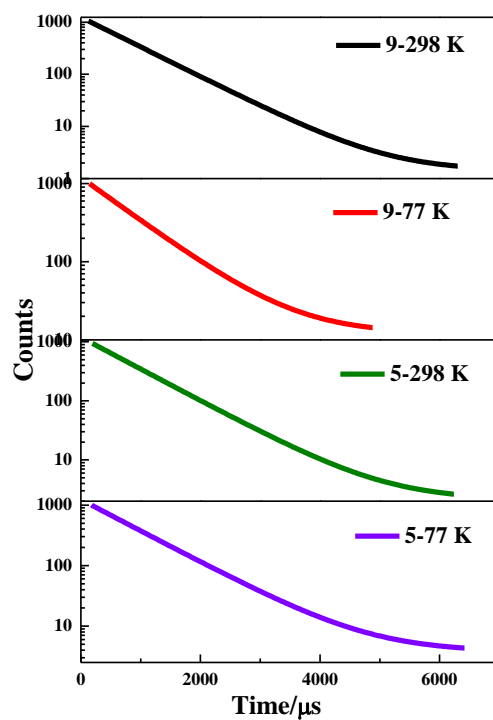

**Fig. S12** Luminescence decay curves of complexes **5** and **9** in the solid state at 298 K and 77 K.



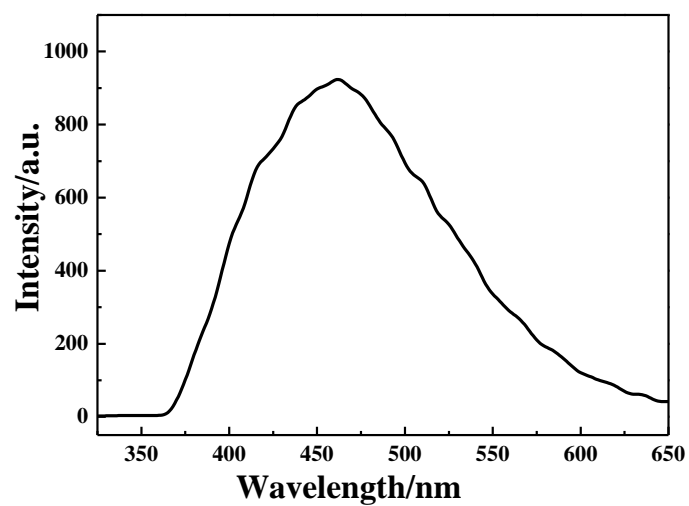

**Fig. S13** Emission spectrum of complex **8** in the solid state at 298 K.

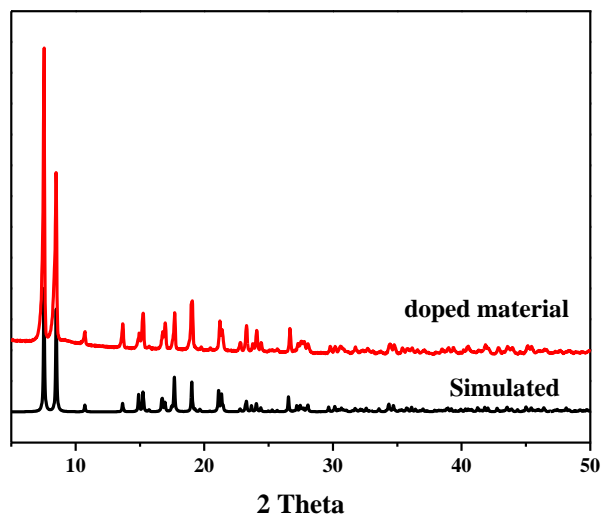

**Fig. S14** The PXRD patterns of doped material  $\{[\text{Gd}_{0.92}\text{Eu}_{0.04}\text{Tb}_{0.04}(\text{dpob})(\text{H}_2\text{O})_2] \cdot 0.5\text{H}_2\text{O}\}_n$  with the relevant simulated pattern.

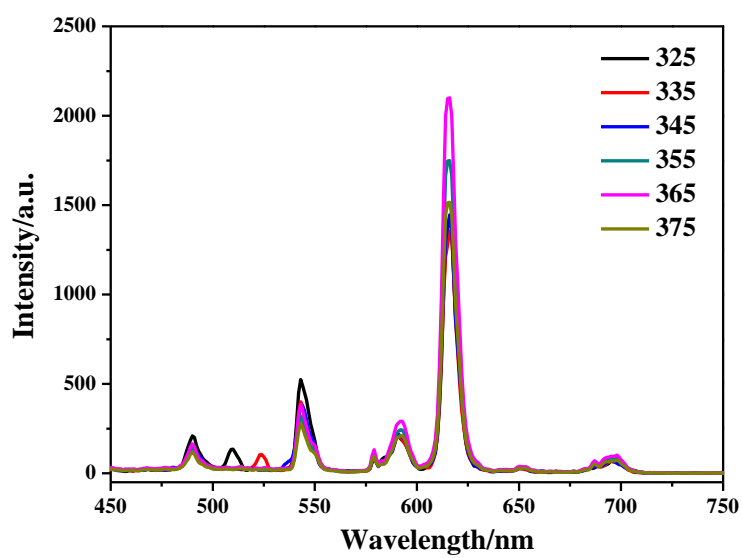

**Fig. S15** Solid-state emission spectra of mixed lanthanide complex  $\{[\text{Gd}_{0.92}\text{Eu}_{0.04}\text{Tb}_{0.04}(\text{dpob})(\text{H}_2\text{O})_2] \cdot 0.5\text{H}_2\text{O}\}_n$  excited at different wavelength.

Table S1 Selected bond lengths in complexes **1-9**.

| <b>1</b>     |           | <b>2</b>     |           | <b>3</b>     |           |
|--------------|-----------|--------------|-----------|--------------|-----------|
| Eu(1)-O(6)#1 | 2.335(11) | Eu(1)-O(10)  | 2.391(4)  | Sm(1)-O(3)   | 2.390(4)  |
| Eu(1)-O(4)#2 | 2.383(12) | Eu(1)-O(2)#3 | 2.398(4)  | Sm(1)-O(11)  | 2.408(4)  |
| Eu(1)-O(7)   | 2.396(12) | Eu(1)-O(11)  | 2.408(4)  | Sm(1)-O(10)  | 2.420(4)  |
| Eu(1)-O(3)#2 | 2.472(10) | Eu(1)-O(9)#2 | 2.420(4)  | Sm(1)-O(8)   | 2.435(4)  |
| Eu(1)-O(5)#3 | 2.503(10) | Eu(1)-O(8)   | 2.439(4)  | Sm(1)-O(9)   | 2.439(3)  |
| Eu(1)-O(2)#2 | 2.516(13) | Eu(1)-O(5)   | 2.442(4)  | Sm(1)-O(5)   | 2.453(4)  |
| Eu(1)-O(4)#3 | 2.529(12) | Eu(1)-O(4)   | 2.473(4)  | Sm(1)-O(4)   | 2.476(4)  |
| Eu(1)-N(2)   | 2.559(14) | Eu(1)-O(3)#1 | 2.487(3)  | Sm(1)-O(2)   | 2.495(4)  |
| Eu(1)-N(1)   | 2.576(15) | Eu(1)-O(2)#1 | 2.580(4)  | Sm(1)-O(3)#1 | 2.588(4)  |
| <b>4</b>     |           | <b>5</b>     |           | <b>6</b>     |           |
| Gd(1)-O(3)   | 2.383(4)  | Tb(1)-O(11)  | 2.379(4)  | Eu(1)-O(9)   | 2.397(10) |
| Gd(1)-O(10)  | 2.384(4)  | Tb(1)-O(10)  | 2.381(5)  | Eu(1)-O(8)   | 2.418(9)  |
| Gd(1)-O(11)  | 2.404(5)  | Tb(1)-O(3)#1 | 2.380(4)  | Eu(1)-O(5)#1 | 2.428(8)  |
| Gd(1)-O(9)   | 2.416(4)  | Tb(1)-O(9)   | 2.416(4)  | Eu(1)-O(6)#2 | 2.437(9)  |
| Gd(1)-O(8)   | 2.423(4)  | Tb(1)-O(8)   | 2.426(4)  | Eu(1)-O(7)#2 | 2.464(10) |
| Gd(1)-O(4)   | 2.439(4)  | Tb(1)-O(4)   | 2.436(4)  | Eu(1)-O(4)#3 | 2.476(10) |
| Gd(1)-O(2)   | 2.459(5)  | Tb(1)-O(2)   | 2.446(4)  | Eu(1)-O(3)   | 2.480(10) |
| Gd(1)-O(5)   | 2.468(4)  | Tb(1)-O(5)   | 2.462(5)  | Eu(1)-O(2)   | 2.498(9)  |
| Gd(1)-O(3)#1 | 2.598(4)  | Tb(1)-O(3)   | 2.620(4)  | Eu(1)-O(5)#3 | 2.604(10) |
| <b>7</b>     |           | <b>8</b>     |           | <b>9</b>     |           |
| Eu(1)-O(2)#1 | 2.406(5)  | Gd(1)-O(2)#1 | 2.380(12) | Tb(1)-O(8)   | 2.375(5)  |
| Eu(1)-O(8)   | 2.413(6)  | Gd(1)-O(8)   | 2.413(13) | Tb(1)-O(4)#1 | 2.376(5)  |
| Eu(1)-O(9)   | 2.430(6)  | Gd(1)-O(9)   | 2.424(14) | Tb(1)-O(9)   | 2.412(6)  |
| Eu(1)-O(6)   | 2.436(6)  | Gd(1)-O(7)   | 2.429(14) | Tb(1)-O(3)   | 2.415(6)  |
| Eu(1)-O(4)   | 2.450(6)  | Gd(1)-O(4)   | 2.454(14) | Tb(1)-O(7)   | 2.436(5)  |
| Eu(1)-O(5)   | 2.464(6)  | Gd(1)-O(5)   | 2.465(12) | Tb(1)-O(6)   | 2.437(6)  |
| Eu(1)-O(3)   | 2.481(6)  | Gd(1)-O(6)   | 2.498(13) | Tb(1)-O(5)   | 2.452(5)  |
| Eu(1)-O(7)   | 2.504(6)  | Gd(1)-O(3)   | 2.513(14) | Tb(1)-O(2)   | 2.473(6)  |
| Eu(1)-O(2)   | 2.548(6)  | Gd(1)-O(2)   | 2.551(13) | Tb(1)-O(4)   | 2.538(6)  |

Symmetry transformations used to generate equivalent atoms: #1  $-x, -y, -z$ ; #2  $-x+1, -y, -z$ ; #3  $x-1, y, z$  (for **1**). #1  $-x+1, -y+1, -z+1$ ; #2  $-x+1, -y+2, -z+1$ ; #3  $x+1, y, z$  (for **2**). #1  $-x, -y+1, -z$  (for **3**). #1  $-x+2, -y+1, -z+1$  (for **4**). #1  $-x+2, -y+1, -z$  (for **5**). #1  $x, y, z+1$ , #2  $x+1, y, z+1$ ; #3  $-x+1, -y, -z+1$  (for **6**). #1  $-x+1, -y+1, -z$  (for **7**). #1  $-x+1, -y, -z$  (for **8**). #1  $-x, -y+1, -z$  (for **9**).

Table S2 Selected bond angles in complexes 1-9.

| <b>1</b>            |            | <b>2</b>            |            | <b>3</b>           |            |
|---------------------|------------|---------------------|------------|--------------------|------------|
| O(6)#1-Eu(1)-O(4)#2 | 73.4(4)    | O(10)-Eu(1)-O(2)#3  | 74.88(13)  | O(3)-Sm(1)-O(11)   | 75.22(13)  |
| O(6)#1-Eu(1)-O(7)   | 136.3(4)   | O(10)-Eu(1)-O(11)   | 76.81(14)  | O(3)-Sm(1)-O(10)   | 82.51(14)  |
| O(4)#2-Eu(1)-O(7)   | 78.0(4)    | O(2)#3-Eu(1)-O(11)  | 83.19(14)  | O(11)-Sm(1)-O(10)  | 76.69(13)  |
| O(6)#1-Eu(1)-O(3)#2 | 122.0(4)   | O(10)-Eu(1)-O(9)#2  | 66.95(14)  | O(3)-Sm(1)-O(8)    | 139.88(12) |
| O(4)#2-Eu(1)-O(3)#2 | 72.5(4)    | O(2)#3-Eu(1)-O(9)#2 | 139.61(13) | O(11)-Sm(1)-O(8)   | 66.88(13)  |
| O(7)-Eu(1)-O(3)#2   | 78.2(4)    | O(11)-Eu(1)-O(9)#2  | 75.92(14)  | O(10)-Sm(1)-O(8)   | 76.61(14)  |
| O(6)#1-Eu(1)-O(5)#3 | 85.5(4)    | O(10)-Eu(1)-O(8)    | 133.43(13) | O(3)-Sm(1)-O(9)    | 151.17(13) |
| O(4)#2-Eu(1)-O(5)#3 | 125.2(4)   | O(2)#3-Eu(1)-O(8)   | 151.24(12) | O(11)-Sm(1)-O(9)   | 133.20(13) |
| O(7)-Eu(1)-O(5)#3   | 84.6(4)    | O(11)-Eu(1)-O(8)    | 97.34(15)  | O(10)-Sm(1)-O(9)   | 98.12(13)  |
| O(3)#2-Eu(1)-O(5)#3 | 152.0(4)   | O(9)#2-Eu(1)-O(8)   | 66.83(13)  | O(8)-Sm(1)-O(9)    | 66.70(12)  |
| O(6)#1-Eu(1)-O(2)#2 | 73.2(4)    | O(10)-Eu(1)-O(5)    | 144.81(13) | O(3)-Sm(1)-O(5)    | 79.44(12)  |
| O(4)#2-Eu(1)-O(2)#2 | 71.0(4)    | O(2)#3-Eu(1)-O(5)   | 79.72(12)  | O(11)-Sm(1)-O(5)   | 144.79(13) |
| O(7)-Eu(1)-O(2)#2   | 126.7(4)   | O(11)-Eu(1)-O(5)    | 124.01(13) | O(10)-Sm(1)-O(5)   | 123.79(13) |
| O(3)#2-Eu(1)-O(2)#2 | 51.9(4)    | O(9)#2-Eu(1)-O(5)   | 140.43(13) | O(8)-Sm(1)-O(5)    | 140.44(12) |
| O(5)#3-Eu(1)-O(2)#2 | 148.6(4)   | O(8)-Eu(1)-O(5)     | 76.24(12)  | O(9)-Sm(1)-O(5)    | 76.37(12)  |
| O(6)#1-Eu(1)-O(4)#3 | 69.9(4)    | O(10)-Eu(1)-O(4)    | 141.75(14) | O(3)-Sm(1)-O(4)    | 80.77(12)  |
| O(4)#2-Eu(1)-O(4)#3 | 72.8(4)    | O(2)#3-Eu(1)-O(4)   | 80.52(13)  | O(11)-Sm(1)-O(4)   | 142.17(13) |
| O(7)-Eu(1)-O(4)#3   | 70.3(4)    | O(11)-Eu(1)-O(4)    | 71.52(13)  | O(10)-Sm(1)-O(4)   | 71.50(13)  |
| O(3)#2-Eu(1)-O(4)#3 | 136.9(4)   | O(9)#2-Eu(1)-O(4)   | 123.06(13) | O(8)-Sm(1)-O(4)    | 122.76(12) |
| O(5)#3-Eu(1)-O(4)#3 | 52.4(4)    | O(8)-Eu(1)-O(4)     | 72.54(13)  | O(9)-Sm(1)-O(4)    | 72.30(13)  |
| O(2)#2-Eu(1)-O(4)#3 | 134.0(4)   | O(5)-Eu(1)-O(4)     | 53.27(12)  | O(5)-Sm(1)-O(4)    | 53.29(12)  |
| O(6)#1-Eu(1)-N(2)   | 78.4(4)    | O(10)-Eu(1)-O(3)#1  | 85.91(14)  | O(3)-Sm(1)-O(2)    | 116.96(12) |
| O(4)#2-Eu(1)-N(2)   | 139.0(4)   | O(2)#3-Eu(1)-O(3)#1 | 116.85(12) | O(11)-Sm(1)-O(2)   | 85.59(13)  |
| O(7)-Eu(1)-N(2)     | 140.9(4)   | O(11)-Eu(1)-O(3)#1  | 149.24(13) | O(10)-Sm(1)-O(2)   | 149.49(14) |
| O(3)#2-Eu(1)-N(2)   | 99.1(4)    | O(9)#2-Eu(1)-O(3)#1 | 73.93(13)  | O(8)-Sm(1)-O(2)    | 73.62(13)  |
| O(5)#3-Eu(1)-N(2)   | 80.7(4)    | O(8)-Eu(1)-O(3)#1   | 76.27(12)  | O(9)-Sm(1)-O(2)    | 76.14(12)  |
| O(2)#2-Eu(1)-N(2)   | 72.7(5)    | O(5)-Eu(1)-O(3)#1   | 84.24(12)  | O(5)-Sm(1)-O(2)    | 84.53(12)  |
| O(4)#3-Eu(1)-N(2)   | 123.8(4)   | O(4)-Eu(1)-O(3)#1   | 131.75(12) | O(4)-Sm(1)-O(2)    | 131.76(12) |
| O(6)#1-Eu(1)-N(1)   | 140.2(5)   | O(10)-Eu(1)-O(2)#1  | 71.57(13)  | O(3)-Sm(1)-O(3)#1  | 65.84(14)  |
| O(4)#2-Eu(1)-N(1)   | 144.7(5)   | O(2)#3-Eu(1)-O(2)#1 | 65.79(13)  | O(11)-Sm(1)-O(3)#1 | 71.37(12)  |
| O(7)-Eu(1)-N(1)     | 78.1(5)    | O(11)-Eu(1)-O(2)#1  | 140.17(14) | O(10)-Sm(1)-O(3)#1 | 139.46(12) |
| O(3)#2-Eu(1)-N(1)   | 77.4(4)    | O(9)#2-Eu(1)-O(2)#1 | 111.72(12) | O(8)-Sm(1)-O(3)#1  | 111.53(12) |
| O(5)#3-Eu(1)-N(1)   | 77.6(4)    | O(8)-Eu(1)-O(2)#1   | 121.96(12) | O(9)-Sm(1)-O(3)#1  | 121.91(12) |
| O(2)#2-Eu(1)-N(1)   | 104.1(5)   | O(5)-Eu(1)-O(2)#1   | 76.00(11)  | O(5)-Sm(1)-O(3)#1  | 76.16(12)  |
| O(4)#3-Eu(1)-N(1)   | 121.8(4)   | O(4)-Eu(1)-O(2)#1   | 123.32(12) | O(4)-Sm(1)-O(3)#1  | 123.73(12) |
| N(2)-Eu(1)-N(1)     | 63.5(5)    | O(3)#1-Eu(1)-O(2)#1 | 51.07(12)  | O(2)-Sm(1)-O(3)#1  | 51.13(11)  |
| <b>4</b>            |            | <b>5</b>            |            | <b>6</b>           |            |
| O(3)-Gd(1)-O(10)    | 75.23(15)  | O(11)-Tb(1)-O(10)   | 77.48(17)  | O(9)-Eu(1)-O(8)    | 75.3(4)    |
| O(3)-Gd(1)-O(11)    | 83.54(18)  | O(11)-Tb(1)-O(3)#1  | 74.78(15)  | O(9)-Eu(1)-O(5)#1  | 79.3(3)    |
| O(10)-Gd(1)-O(11)   | 77.12(17)  | O(10)-Tb(1)-O(3)#1  | 83.23(18)  | O(8)-Eu(1)-O(5)#1  | 81.7(3)    |
| O(3)-Gd(1)-O(9)     | 150.63(15) | O(11)-Tb(1)-O(9)    | 134.19(15) | O(9)-Eu(1)-O(6)#2  | 147.9(4)   |
| O(10)-Gd(1)-O(9)    | 133.61(15) | O(10)-Tb(1)-O(9)    | 96.52(18)  | O(8)-Eu(1)-O(6)#2  | 125.4(3)   |

|                    |            |                   |            |                     |            |
|--------------------|------------|-------------------|------------|---------------------|------------|
| O(11)-Gd(1)-O(9)   | 96.59(18)  | O(3)#1-Tb(1)-O(9) | 150.47(14) | O(5)#1-Eu(1)-O(6)#2 | 80.1(3)    |
| O(3)-Gd(1)-O(8)    | 139.89(15) | O(11)-Tb(1)-O(8)  | 67.25(14)  | O(9)-Eu(1)-O(7)#2   | 145.1(4)   |
| O(10)-Gd(1)-O(8)   | 66.89(14)  | O(10)-Tb(1)-O(8)  | 75.77(17)  | O(8)-Eu(1)-O(7)#2   | 73.1(3)    |
| O(11)-Gd(1)-O(8)   | 75.84(18)  | O(3)#1-Tb(1)-O(8) | 139.61(13) | O(5)#1-Eu(1)-O(7)#2 | 81.7(3)    |
| O(9)-Gd(1)-O(8)    | 67.02(14)  | O(9)-Tb(1)-O(8)   | 67.27(13)  | O(6)#2-Eu(1)-O(7)#2 | 53.5(3)    |
| O(3)-Gd(1)-O(4)    | 79.57(15)  | O(11)-Tb(1)-O(4)  | 144.16(14) | O(9)-Eu(1)-O(4)#3   | 84.3(4)    |
| O(10)-Gd(1)-O(4)   | 144.79(15) | O(10)-Tb(1)-O(4)  | 124.15(15) | O(8)-Eu(1)-O(4)#3   | 149.5(3)   |
| O(11)-Gd(1)-O(4)   | 124.08(16) | O(3)#1-Tb(1)-O(4) | 79.71(15)  | O(5)#1-Eu(1)-O(4)#3 | 116.8(3)   |
| O(9)-Gd(1)-O(4)    | 76.13(14)  | O(9)-Tb(1)-O(4)   | 76.09(14)  | O(6)#2-Eu(1)-O(4)#3 | 83.3(3)    |
| O(8)-Gd(1)-O(4)    | 140.30(15) | O(8)-Tb(1)-O(4)   | 140.45(13) | O(7)#2-Eu(1)-O(4)#3 | 130.6(3)   |
| O(3)-Gd(1)-O(2)    | 116.68(14) | O(11)-Tb(1)-O(2)  | 86.19(16)  | O(9)-Eu(1)-O(3)     | 76.0(3)    |
| O(10)-Gd(1)-O(2)   | 85.96(16)  | O(10)-Tb(1)-O(2)  | 149.65(16) | O(8)-Eu(1)-O(3)     | 78.5(4)    |
| O(11)-Gd(1)-O(2)   | 149.48(17) | O(3)#1-Tb(1)-O(2) | 117.13(13) | O(5)#1-Eu(1)-O(3)   | 151.5(3)   |
| O(9)-Gd(1)-O(2)    | 76.90(15)  | O(9)-Tb(1)-O(2)   | 76.73(14)  | O(6)#2-Eu(1)-O(3)   | 128.2(3)   |
| O(8)-Gd(1)-O(2)    | 74.19(16)  | O(8)-Tb(1)-O(2)   | 74.35(15)  | O(7)#2-Eu(1)-O(3)   | 111.4(4)   |
| O(4)-Gd(1)-O(2)    | 83.80(15)  | O(4)-Tb(1)-O(2)   | 83.46(14)  | O(4)#3-Eu(1)-O(3)   | 74.7(4)    |
| O(3)-Gd(1)-O(5)    | 79.95(14)  | O(11)-Tb(1)-O(5)  | 140.97(15) | O(9)-Eu(1)-O(2)     | 127.8(3)   |
| O(10)-Gd(1)-O(5)   | 141.51(17) | O(10)-Tb(1)-O(5)  | 70.73(15)  | O(8)-Eu(1)-O(2)     | 98.6(4)    |
| O(11)-Gd(1)-O(5)   | 71.20(16)  | O(3)#1-Tb(1)-O(5) | 79.44(14)  | O(5)#1-Eu(1)-O(2)   | 152.3(3)   |
| O(9)-Gd(1)-O(5)    | 72.44(15)  | O(9)-Tb(1)-O(5)   | 72.73(14)  | O(6)#2-Eu(1)-O(2)   | 77.3(3)    |
| O(8)-Gd(1)-O(5)    | 123.28(15) | O(8)-Tb(1)-O(5)   | 123.39(15) | O(7)#2-Eu(1)-O(2)   | 72.1(3)    |
| O(4)-Gd(1)-O(5)    | 53.54(15)  | O(4)-Tb(1)-O(5)   | 54.03(13)  | O(4)#3-Eu(1)-O(2)   | 76.2(3)    |
| O(2)-Gd(1)-O(5)    | 131.88(15) | O(2)-Tb(1)-O(5)   | 132.09(14) | O(3)-Eu(1)-O(2)     | 52.3(3)    |
| O(3)-Gd(1)-O(3)#1  | 65.68(17)  | O(11)-Tb(1)-O(3)  | 71.33(14)  | O(9)-Eu(1)-O(5)#3   | 72.3(3)    |
| O(10)-Gd(1)-O(3)#1 | 71.51(15)  | O(10)-Tb(1)-O(3)  | 140.59(16) | O(8)-Eu(1)-O(5)#3   | 137.7(3)   |
| O(11)-Gd(1)-O(3)#1 | 140.39(16) | O(3)#1-Tb(1)-O(3) | 65.94(15)  | O(5)#1-Eu(1)-O(5)#3 | 66.2(3)    |
| O(9)-Gd(1)-O(3)#1  | 122.54(15) | O(9)-Tb(1)-O(3)   | 122.48(13) | O(6)#2-Eu(1)-O(5)#3 | 76.9(3)    |
| O(8)-Gd(1)-O(3)#1  | 111.79(15) | O(8)-Tb(1)-O(3)   | 112.03(15) | O(7)#2-Eu(1)-O(5)#3 | 125.0(3)   |
| O(4)-Gd(1)-O(3)#1  | 75.90(14)  | O(4)-Tb(1)-O(3)   | 75.47(13)  | O(4)#3-Eu(1)-O(5)#3 | 50.6(3)    |
| O(2)-Gd(1)-O(3)#1  | 51.02(13)  | O(2)-Tb(1)-O(3)   | 51.21(12)  | O(3)-Eu(1)-O(5)#3   | 118.1(3)   |
| O(5)-Gd(1)-O(3)#1  | 123.16(14) | O(5)-Tb(1)-O(3)   | 122.97(14) | O(2)-Eu(1)-O(5)#3   | 122.7(3)   |
| <b>7</b>           |            | <b>8</b>          |            | <b>9</b>            |            |
| O(2)#1-Eu(1)-O(8)  | 76.8(2)    | O(2)#1-Gd(1)-O(8) | 77.8(4)    | O(8)-Tb(1)-O(4)#1   | 76.5(2)    |
| O(2)#1-Eu(1)-O(9)  | 83.7(2)    | O(2)#1-Gd(1)-O(9) | 83.2(5)    | O(8)-Tb(1)-O(9)     | 75.0(2)    |
| O(8)-Eu(1)-O(9)    | 74.3(2)    | O(8)-Gd(1)-O(9)   | 74.9(5)    | O(4)#1-Tb(1)-O(9)   | 83.91(19)  |
| O(2)#1-Eu(1)-O(6)  | 152.0(2)   | O(2)#1-Gd(1)-O(7) | 152.2(4)   | O(8)-Tb(1)-O(3)     | 78.35(19)  |
| O(8)-Eu(1)-O(6)    | 78.3(2)    | O(8)-Gd(1)-O(7)   | 77.9(5)    | O(4)#1-Tb(1)-O(3)   | 151.69(16) |
| O(9)-Eu(1)-O(6)    | 77.4(2)    | O(9)-Gd(1)-O(7)   | 77.6(5)    | O(9)-Tb(1)-O(3)     | 77.17(19)  |
| O(2)#1-Eu(1)-O(4)  | 83.3(2)    | O(2)#1-Gd(1)-O(4) | 82.7(4)    | O(8)-Tb(1)-O(7)     | 146.85(18) |
| O(8)-Eu(1)-O(4)    | 142.2(2)   | O(8)-Gd(1)-O(4)   | 143.1(4)   | O(4)#1-Tb(1)-O(7)   | 78.2(2)    |
| O(9)-Eu(1)-O(4)    | 71.8(2)    | O(9)-Gd(1)-O(4)   | 71.9(5)    | O(9)-Tb(1)-O(7)     | 123.09(18) |
| O(6)-Eu(1)-O(4)    | 109.5(2)   | O(7)-Gd(1)-O(4)   | 109.6(5)   | O(3)-Tb(1)-O(7)     | 129.87(19) |
| O(2)#1-Eu(1)-O(5)  | 78.1(2)    | O(2)#1-Gd(1)-O(5) | 77.2(4)    | O(8)-Tb(1)-O(6)     | 141.86(18) |
| O(8)-Eu(1)-O(5)    | 147.3(2)   | O(8)-Gd(1)-O(5)   | 146.7(5)   | O(4)#1-Tb(1)-O(6)   | 83.1(2)    |

|                   |            |                   |          |                   |            |
|-------------------|------------|-------------------|----------|-------------------|------------|
| O(9)-Eu(1)-O(5)   | 123.1(2)   | O(9)-Gd(1)-O(5)   | 123.1(4) | O(9)-Tb(1)-O(6)   | 71.07(19)  |
| O(6)-Eu(1)-O(5)   | 129.7(2)   | O(7)-Gd(1)-O(5)   | 130.3(4) | O(3)-Tb(1)-O(6)   | 109.8(2)   |
| O(4)-Eu(1)-O(5)   | 53.0(2)    | O(4)-Gd(1)-O(5)   | 53.0(4)  | O(7)-Tb(1)-O(6)   | 53.49(17)  |
| O(2)#1-Eu(1)-O(3) | 115.1(2)   | O(2)#1-Gd(1)-O(6) | 152.8(4) | O(8)-Tb(1)-O(5)   | 84.89(19)  |
| O(8)-Eu(1)-O(3)   | 84.3(2)    | O(8)-Gd(1)-O(6)   | 129.4(4) | O(4)#1-Tb(1)-O(5) | 115.53(18) |
| O(9)-Eu(1)-O(3)   | 147.6(2)   | O(9)-Gd(1)-O(6)   | 103.4(5) | O(9)-Tb(1)-O(5)   | 148.07(19) |
| O(6)-Eu(1)-O(3)   | 74.6(2)    | O(7)-Gd(1)-O(6)   | 53.3(4)  | O(3)-Tb(1)-O(5)   | 74.6(2)    |
| O(4)-Eu(1)-O(3)   | 133.5(2)   | O(4)-Gd(1)-O(6)   | 74.6(4)  | O(7)-Tb(1)-O(5)   | 86.97(19)  |
| O(5)-Eu(1)-O(3)   | 87.7(2)    | O(5)-Gd(1)-O(6)   | 77.2(4)  | O(6)-Tb(1)-O(5)   | 133.19(18) |
| O(2)#1-Eu(1)-O(7) | 153.5(2)   | O(2)#1-Gd(1)-O(3) | 115.3(4) | O(8)-Tb(1)-O(2)   | 130.2(2)   |
| O(8)-Eu(1)-O(7)   | 129.7(2)   | O(8)-Gd(1)-O(3)   | 83.8(4)  | O(4)#1-Tb(1)-O(2) | 153.30(17) |
| O(9)-Eu(1)-O(7)   | 102.3(2)   | O(9)-Gd(1)-O(3)   | 148.2(4) | O(9)-Tb(1)-O(2)   | 101.6(2)   |
| O(6)-Eu(1)-O(7)   | 52.8(2)    | O(7)-Gd(1)-O(3)   | 75.1(5)  | O(3)-Tb(1)-O(2)   | 53.22(17)  |
| O(4)-Eu(1)-O(7)   | 74.4(2)    | O(4)-Gd(1)-O(3)   | 133.1(4) | O(7)-Tb(1)-O(2)   | 76.9(2)    |
| O(5)-Eu(1)-O(7)   | 77.1(2)    | O(5)-Gd(1)-O(3)   | 87.4(4)  | O(6)-Tb(1)-O(2)   | 74.4(2)    |
| O(3)-Eu(1)-O(7)   | 73.0(2)    | O(6)-Gd(1)-O(3)   | 72.5(4)  | O(5)-Tb(1)-O(2)   | 72.83(19)  |
| O(2)#1-Eu(1)-O(2) | 63.6(2)    | O(2)#1-Gd(1)-O(2) | 63.9(5)  | O(8)-Tb(1)-O(4)   | 71.70(17)  |
| O(8)-Eu(1)-O(2)   | 72.00(19)  | O(8)-Gd(1)-O(2)   | 71.5(4)  | O(4)#1-Tb(1)-O(4) | 63.54(19)  |
| O(9)-Eu(1)-O(2)   | 137.2(2)   | O(9)-Gd(1)-O(2)   | 136.8(4) | O(9)-Tb(1)-O(4)   | 137.63(17) |
| O(6)-Eu(1)-O(2)   | 119.7(2)   | O(7)-Gd(1)-O(2)   | 119.7(5) | O(3)-Tb(1)-O(4)   | 119.66(18) |
| O(4)-Eu(1)-O(2)   | 126.1(2)   | O(4)-Gd(1)-O(2)   | 126.1(4) | O(7)-Tb(1)-O(4)   | 78.00(16)  |
| O(5)-Eu(1)-O(2)   | 78.2(2)    | O(5)-Gd(1)-O(2)   | 77.9(4)  | O(6)-Tb(1)-O(4)   | 126.13(18) |
| O(3)-Eu(1)-O(2)   | 51.54(19)  | O(6)-Gd(1)-O(2)   | 118.8(4) | O(5)-Tb(1)-O(4)   | 52.01(17)  |
| O(7)-Eu(1)-O(2)   | 119.39(19) | O(3)-Gd(1)-O(2)   | 51.4(4)  | O(2)-Tb(1)-O(4)   | 119.82(17) |

Symmetry transformations used to generate equivalent atoms: #1  $-x, -y, -z$ ; #2  $-x+1, -y, -z$ ; #3  $x-1, y, z$  (for **1**). #1  $-x+1, -y+1, -z+1$ ; #2  $-x+1, -y+2, -z+1$ ; #3  $x+1, y, z$  (for **2**). #1  $-x, -y+1, -z$  (for **3**). #1  $-x+2, -y+1, -z+1$  (for **4**). #1  $-x+2, -y+1, -z$  (for **5**). #1  $x, y, z+1$ , #2  $x+1, y, z+1$ ; #3  $-x+1, -y, -z+1$  (for **6**). #1  $-x+1, -y+1, -z$  (for **7**). #1  $-x+1, -y, -z$  (for **8**). #1  $-x, -y+1, -z$  (for **9**).

Table S3 The geometrical parameters of hydrogen bond and  $\pi \cdots \pi$  stacking interactions of Ln(III) complexes.

|          | D–H $\cdots$ A                          | D–H/Å | H $\cdots$ A/Å | D $\cdots$ A/Å | D–H $\cdots$ A/ $^\circ$ |
|----------|-----------------------------------------|-------|----------------|----------------|--------------------------|
| <b>1</b> | OW1–HW1B $\cdots$ O3                    | 0.850 | 2.274          | 2.975          | 139.91                   |
|          | $\pi \cdots \pi$                        |       | 3.463          |                |                          |
| <b>2</b> | O7–H7A $\cdots$ O6                      | 0.930 | 1.696          | 2.625          | 176.13                   |
| <b>3</b> | O6–H6 $\cdots$ O7 [-x+1, -y+2, -z+1]    | 0.840 | 1.789          | 2.618          | 168.66                   |
|          | O10–H10A $\cdots$ O9 [x-1, y, z]        | 0.850 | 2.009          | 2.773          | 149.18                   |
|          | O10–H10A $\cdots$ O8 [-x, -y, -z]       | 0.850 | 2.608          | 3.381          | 151.75                   |
|          | O11–H11B $\cdots$ O2 [x-1, y, z]        | 0.850 | 2.413          | 2.855          | 113.03                   |
|          | O11–H11B $\cdots$ O9 [x-1, y, z]        | 0.850 | 2.447          | 3.220          | 151.44                   |
| <b>4</b> | O7–H7 $\cdots$ O6 [-x-1, -y, -z]        | 0.820 | 1.820          | 2.628          | 168.17                   |
|          | O10–H10A $\cdots$ O9 [x+1, y, z]        | 0.850 | 2.387          | 3.233          | 173.18                   |
|          | O11–H11B $\cdots$ O8 [-x+2, -y+2, -z+1] | 0.850 | 2.540          | 3.342          | 157.60                   |
| <b>5</b> | O6–H6 $\cdots$ O7 [-x+3, -y+2, -z+1]    | 0.820 | 1.831          | 2.641          | 169.44                   |
|          | O10–H10C $\cdots$ O8 [-x+2, -y+2, -z]   | 0.850 | 2.560          | 3.359          | 157.06                   |
|          | O11–H11A $\cdots$ O9 [x+1, y, z]        | 0.850 | 2.401          | 3.246          | 173.05                   |
|          | O11–H11A $\cdots$ O2 [x+1, y, z]        | 0.850 | 2.489          | 2.895          | 110.21                   |
| <b>6</b> | OW1–HW1C $\cdots$ O7 [-x, -y+1, -z+1]   | 0.850 | 2.415          | 2.970          | 123.50                   |
|          | O8–H8B $\cdots$ OW1                     | 0.850 | 2.082          | 2.799          | 141.70                   |
|          | O8–H8C $\cdots$ O2 [x-1, y, z]          | 0.850 | 2.136          | 2.736          | 127.37                   |
|          | O9–H9A $\cdots$ O6 [-x, -y, -z+1]       | 0.850 | 2.158          | 2.951          | 155.09                   |
|          | O9–H9A $\cdots$ O4 [-x, -y, -z+1]       | 0.850 | 2.499          | 2.906          | 110.38                   |
|          | O9–H9B $\cdots$ O2 [x-1, y, z]          | 0.850 | 2.524          | 3.268          | 146.70                   |
